# Supplementary material for: Localized double phonon scattering and DOS induced thermoelectric enhancement of degenerate nonstoichiometric Li1−xNbO2 compounds
Source: Royal Society of Chemistry journal article supplement (doi:10.1039/c7ra10557f), 2017-01-01
Supplement: c7ra10557f1.pdf [file c7ra10557f1.pdf]

## Supporting Information

### **Localized Double Phonon Scattering and DOS Induced Thermoelectric Enhancement of Degenerated Nonstoichiometric $\text{Li}_{1-x}\text{NbO}_2$ Compounds**

*Jamil Ur Rahman, Nguyen Van Du, Gul Rahman, V. M. García-Suárez, Won-Seon Seo, Myong*

*Ho Kim, and Soonil Lee\**

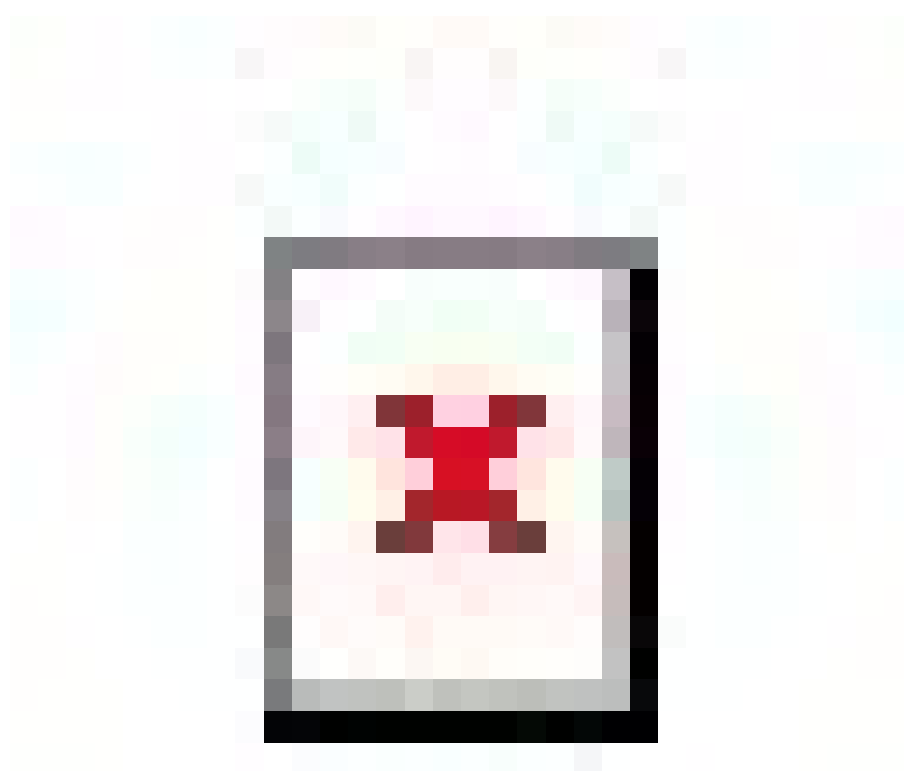

**Figure S1.** SEM images of the fractured surfaces for  $\text{Li}_{1-x}\text{NbO}_2$  ( $x = 0, 0.05, 0.1, 0.2, 0.4$  and  $0.6$ ) at lower magnification.

---

\* Corresponding author: [leesoonil@gmail.com](mailto:leesoonil@gmail.com)  
Tel: +82-55-792-2567, Fax: +82-55-792-2580

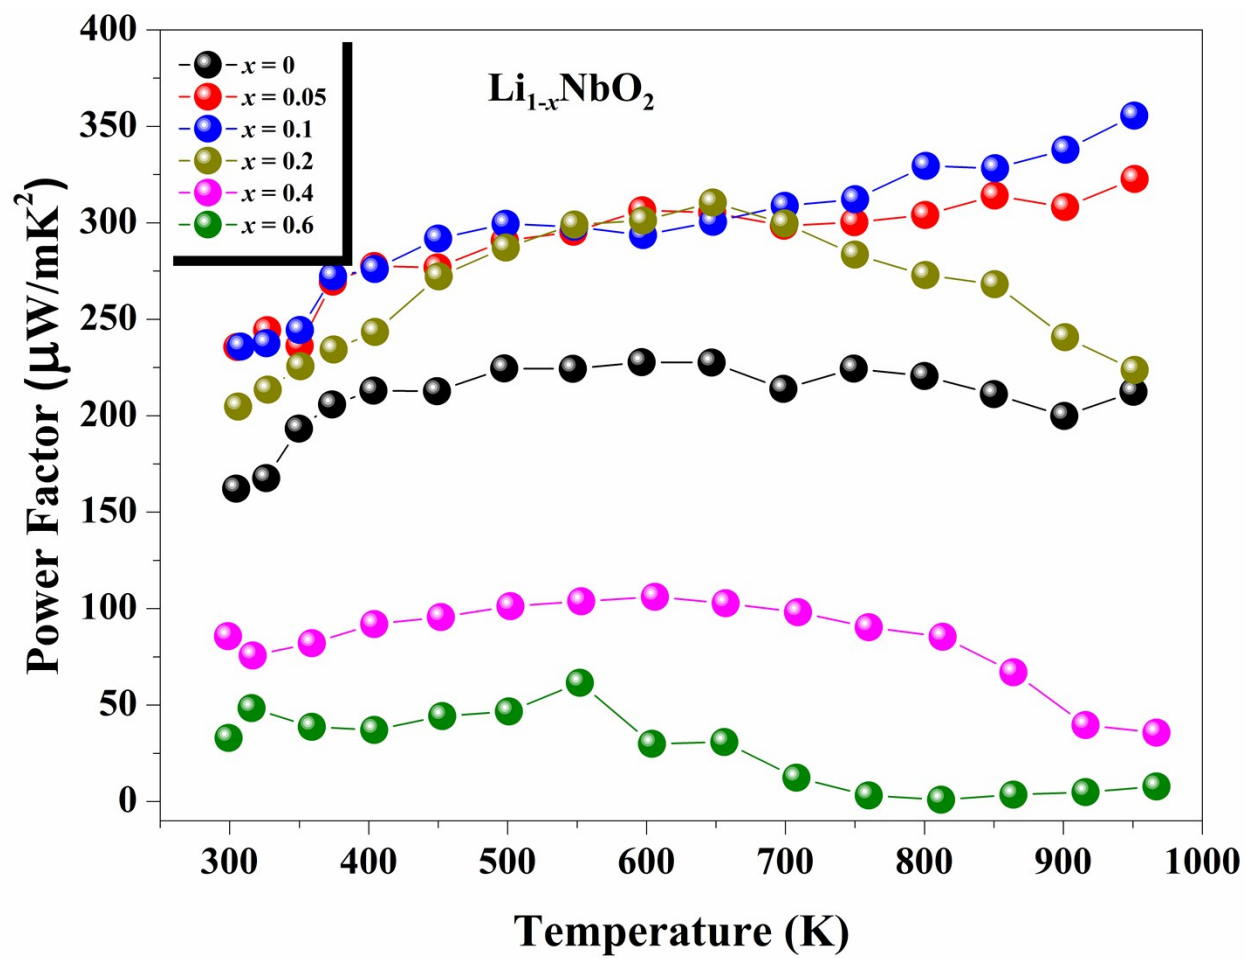

**Figure S2.** Temperature dependence of the power factor of  $\text{Li}_{1-x}\text{NbO}_2$  ( $x = 0, 0.05, 0.1, 0.2, 0.4$  and  $0.6$ ) samples.

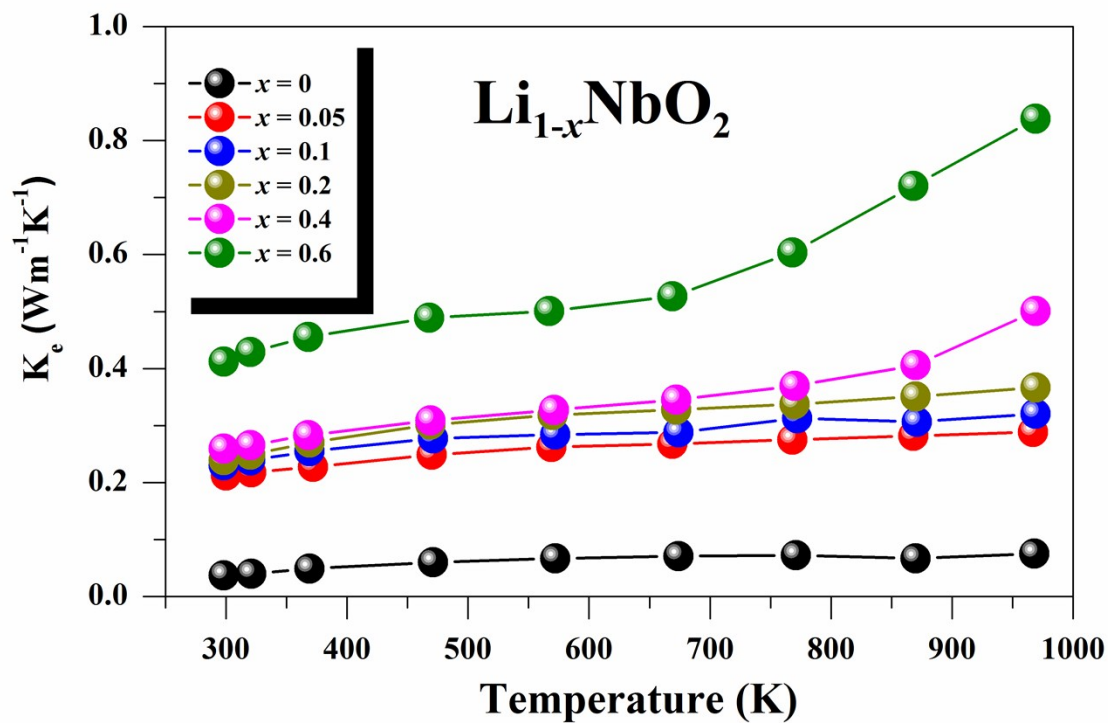

**Figure S3.** Temperature dependent electronic thermal conductivities for Li<sub>1-x</sub>NbO<sub>2</sub> ( $x = 0, 0.05, 0.1, 0.2$  and  $0.4$ ) samples.
